# Supplementary material for: A multimodal imaging workflow to visualize metal mixtures in the human placenta and explore colocalization with biological response markers
Source: Royal Society of Chemistry journal article supplement (doi:10.1039/c6mt00010j), 2016-03-10

## **A multimodal imaging workflow to visualize metal mixtures in the human placenta and explore colocalization with biological response markers**

Megan M. Niedzwiecki<sup>1\*</sup><sup>a</sup>, Christine Austin<sup>1,2</sup>, Romain Remark<sup>3</sup>, Miriam Merad<sup>3</sup>, Sacha Gnjatic<sup>3</sup>, Guadalupe Estrada-Gutierrez<sup>4</sup>, Aurora Espejel-Núñez<sup>5</sup>, Hector Borboa-Olivares<sup>6</sup>, Mario Guzman-Huerta<sup>6</sup>, Rosalind J. Wright<sup>7</sup>, Robert O. Wright<sup>1</sup> and Manish Arora<sup>1\*</sup>

<sup>1</sup>Exposure Biology, Senator Frank R. Lautenberg Environmental Health Sciences Laboratory, Department of Preventive Medicine, Icahn School of Medicine at Mount Sinai, New York City, New York, USA

<sup>2</sup>Faculty of Dentistry, The University of Sydney, Sydney, New South Wales 2006, Australia

<sup>3</sup>Division of Hematology/Oncology and Immunology, The Tisch Cancer Institute, Icahn School of Medicine at Mount Sinai, New York City, New York, USA

<sup>4</sup>Biomedical Research Branch, Instituto Nacional de Perinatología, Mexico City, Mexico

<sup>5</sup>Department of Immunobiochemistry, Instituto Nacional de Perinatología, Mexico City, Mexico

<sup>6</sup>Maternal Fetal Research Unit, Instituto Nacional de Perinatología, Mexico City, Mexico

<sup>7</sup>Mindich Child Health & Development Institute, Icahn School of Medicine at Mount Sinai, New York, New York, USA

**a. Present address:** Rollins School of Public Health, Emory University, 1518 Clifton Road NE, Claudia Nance Rollins Building, 5th Floor, Atlanta, GA 30322.

Supplementary Figure 1. Placenta sample 1, fetal side

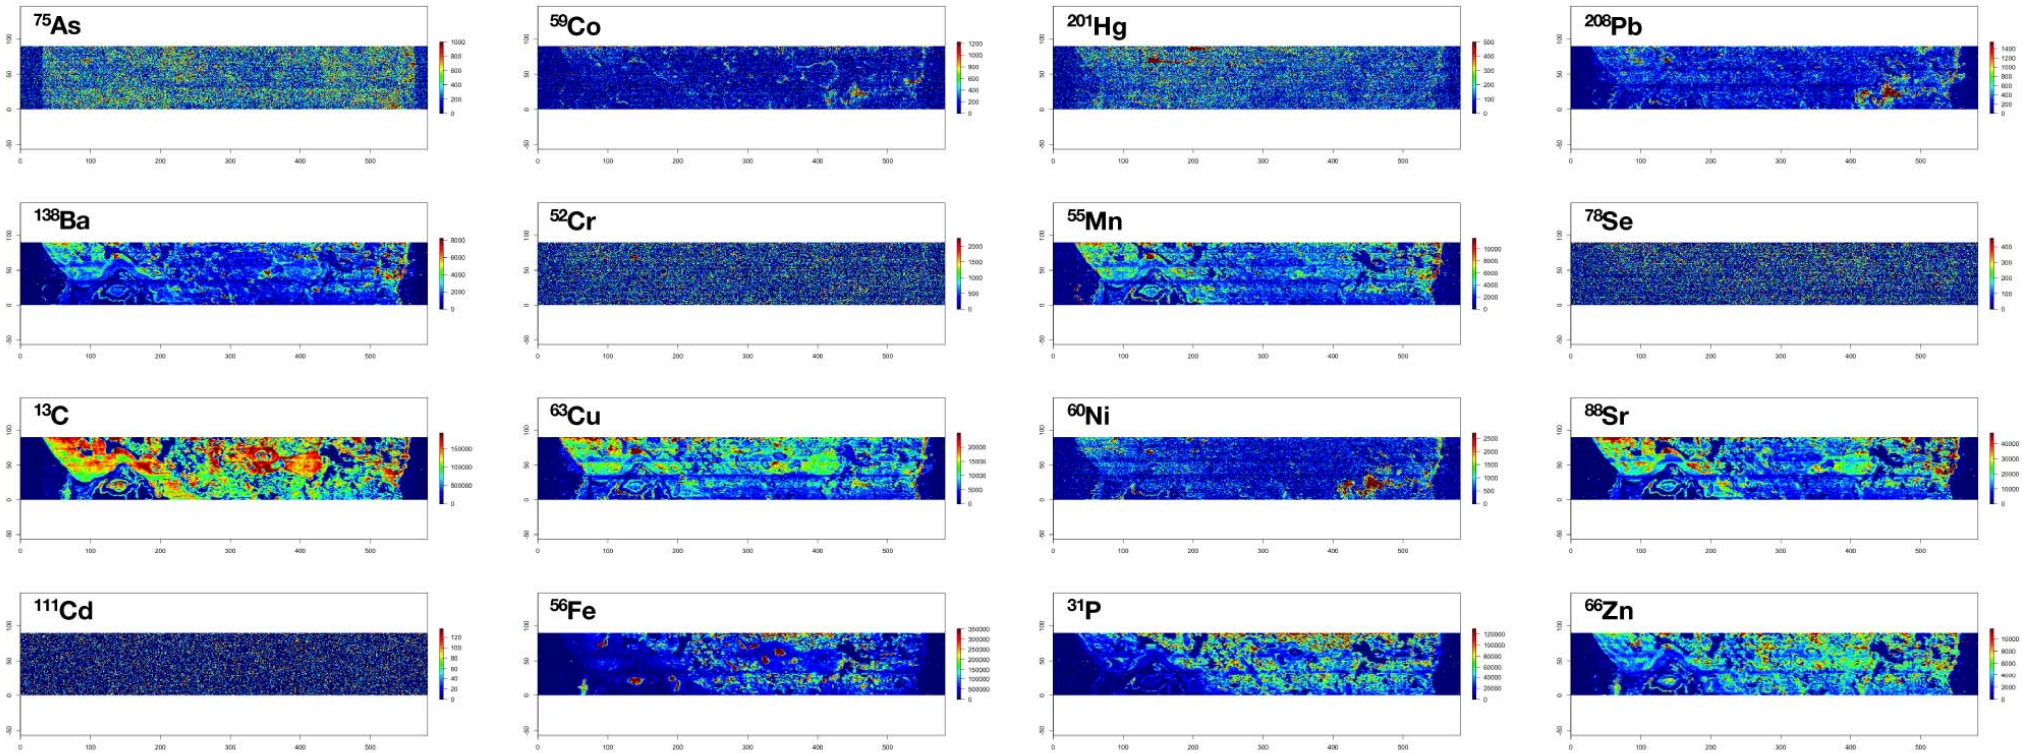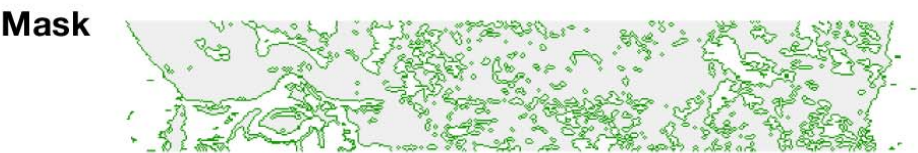

Supplementary Figure 2. Placenta sample 1, maternal side

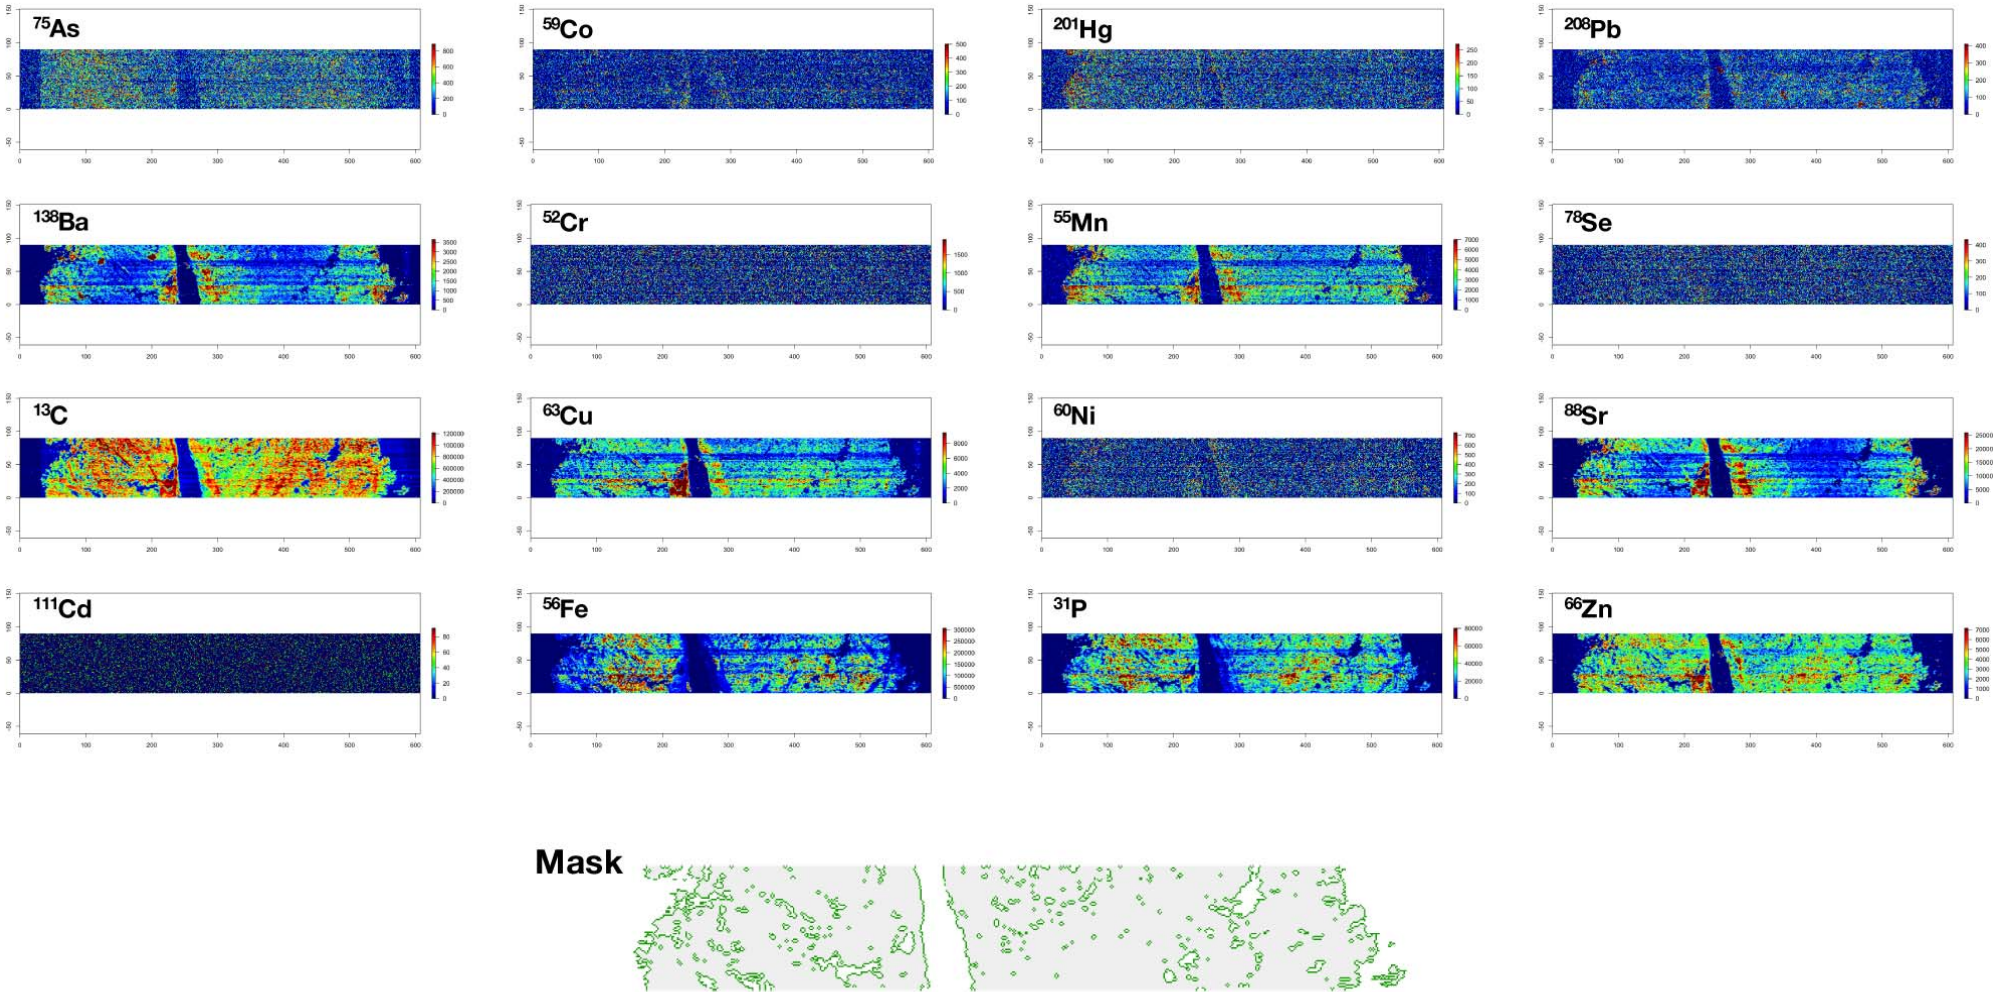



Supplementary Figure 3. Placenta sample 2, fetal side

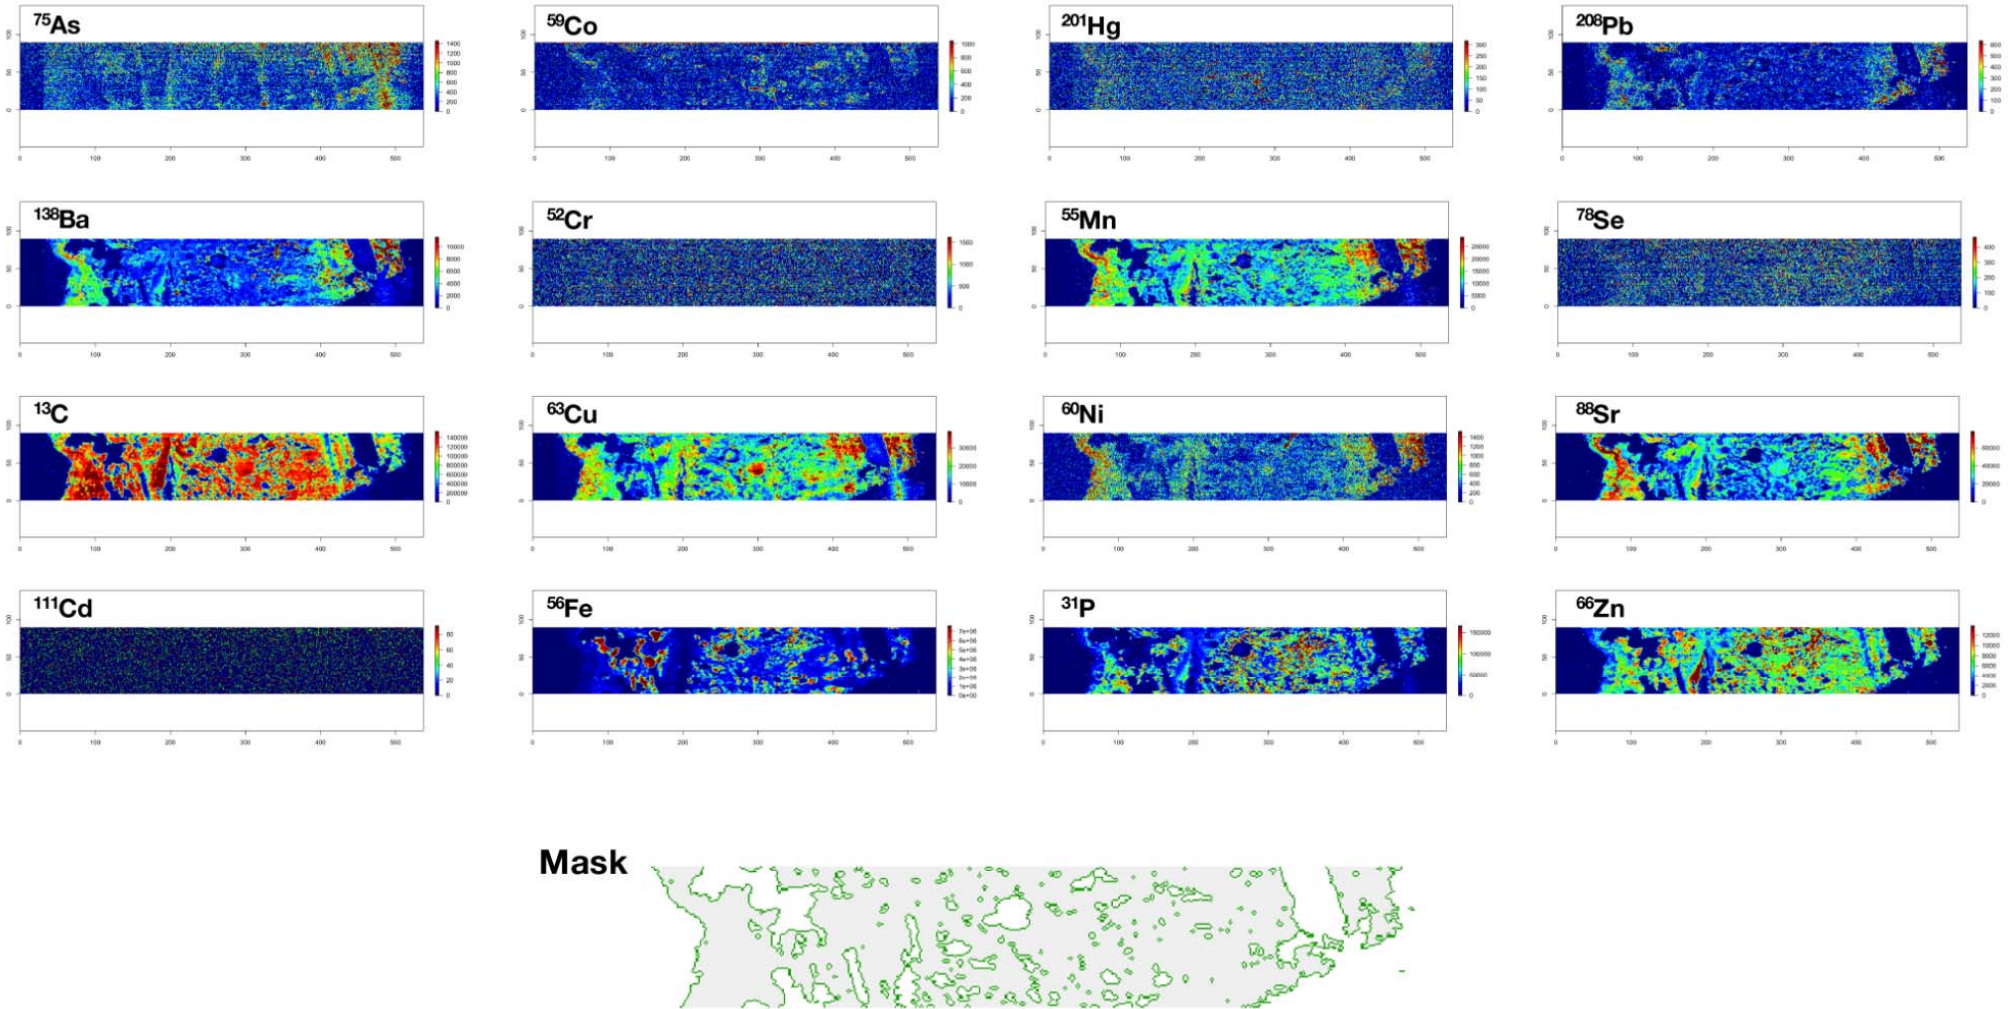

Supplementary Figure 4. Placenta sample 2, maternal side

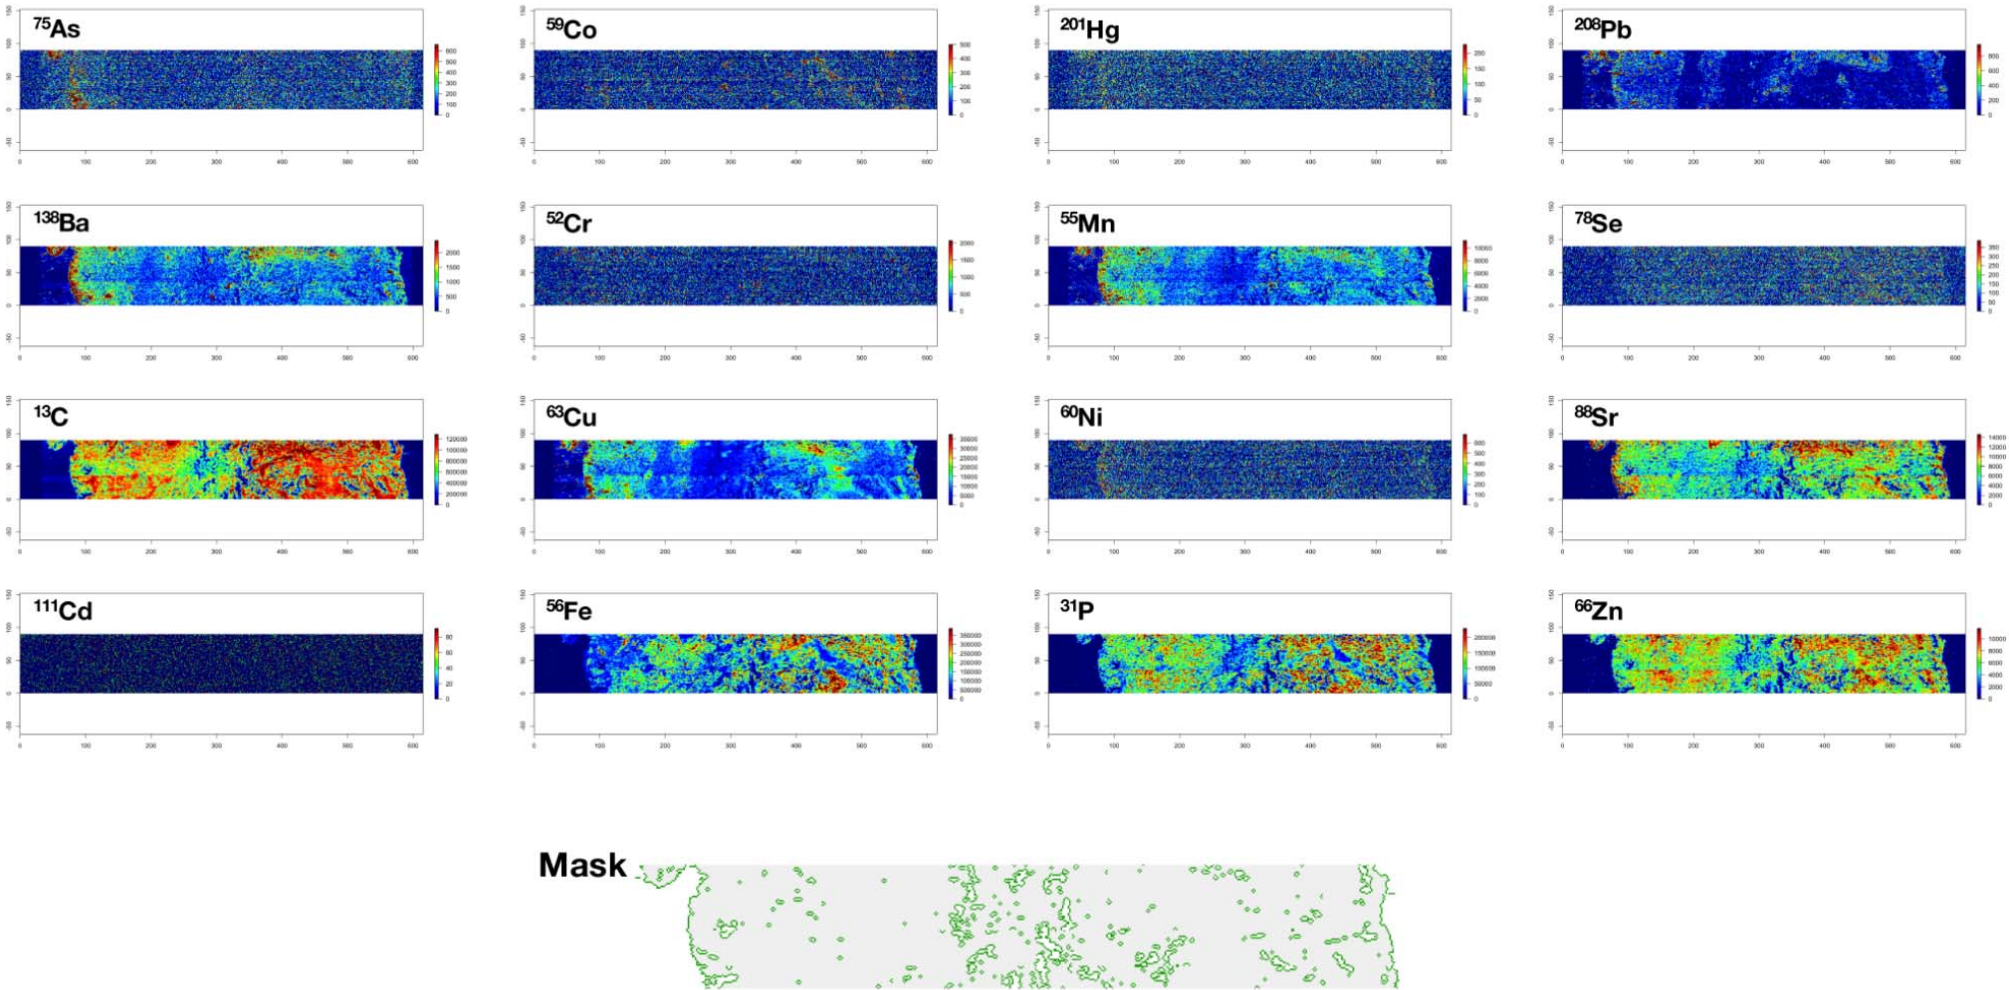

Supplementary Figure 5. Placenta sample 3, fetal side

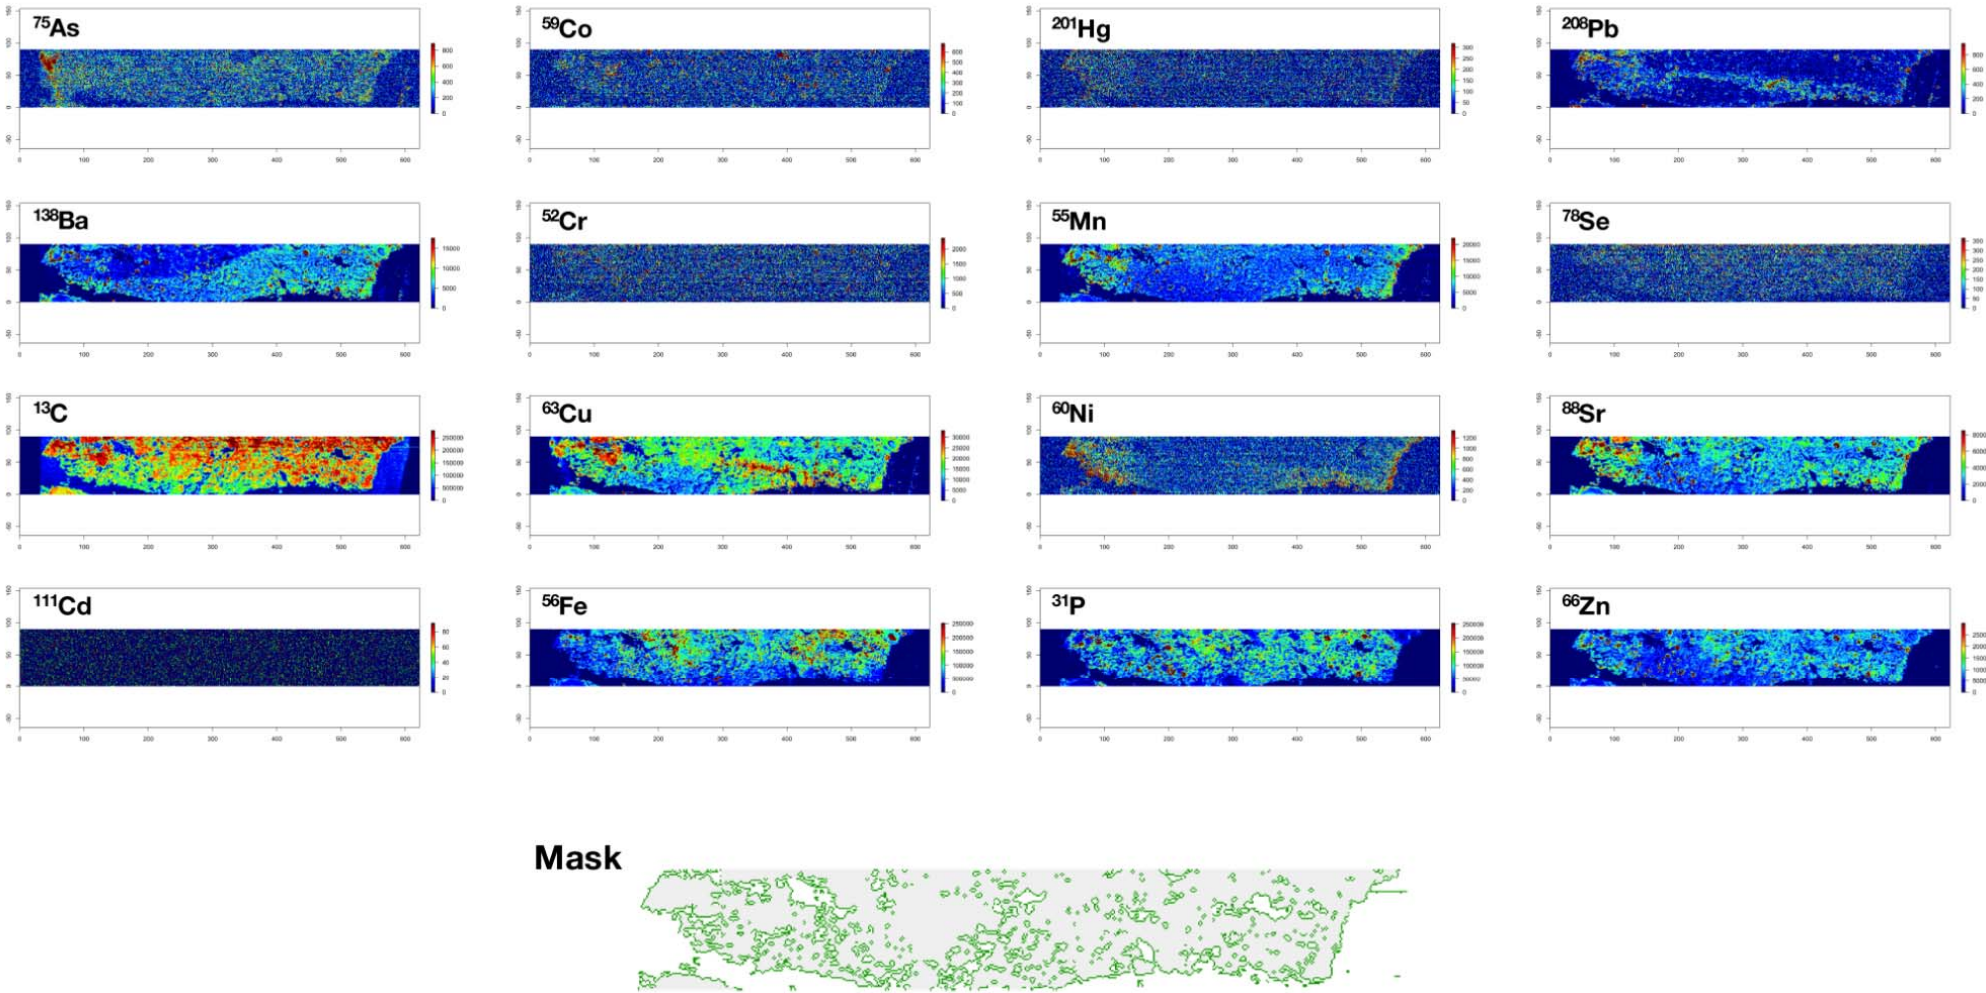



Supplementary Figure 6. Placenta sample 3, maternal side

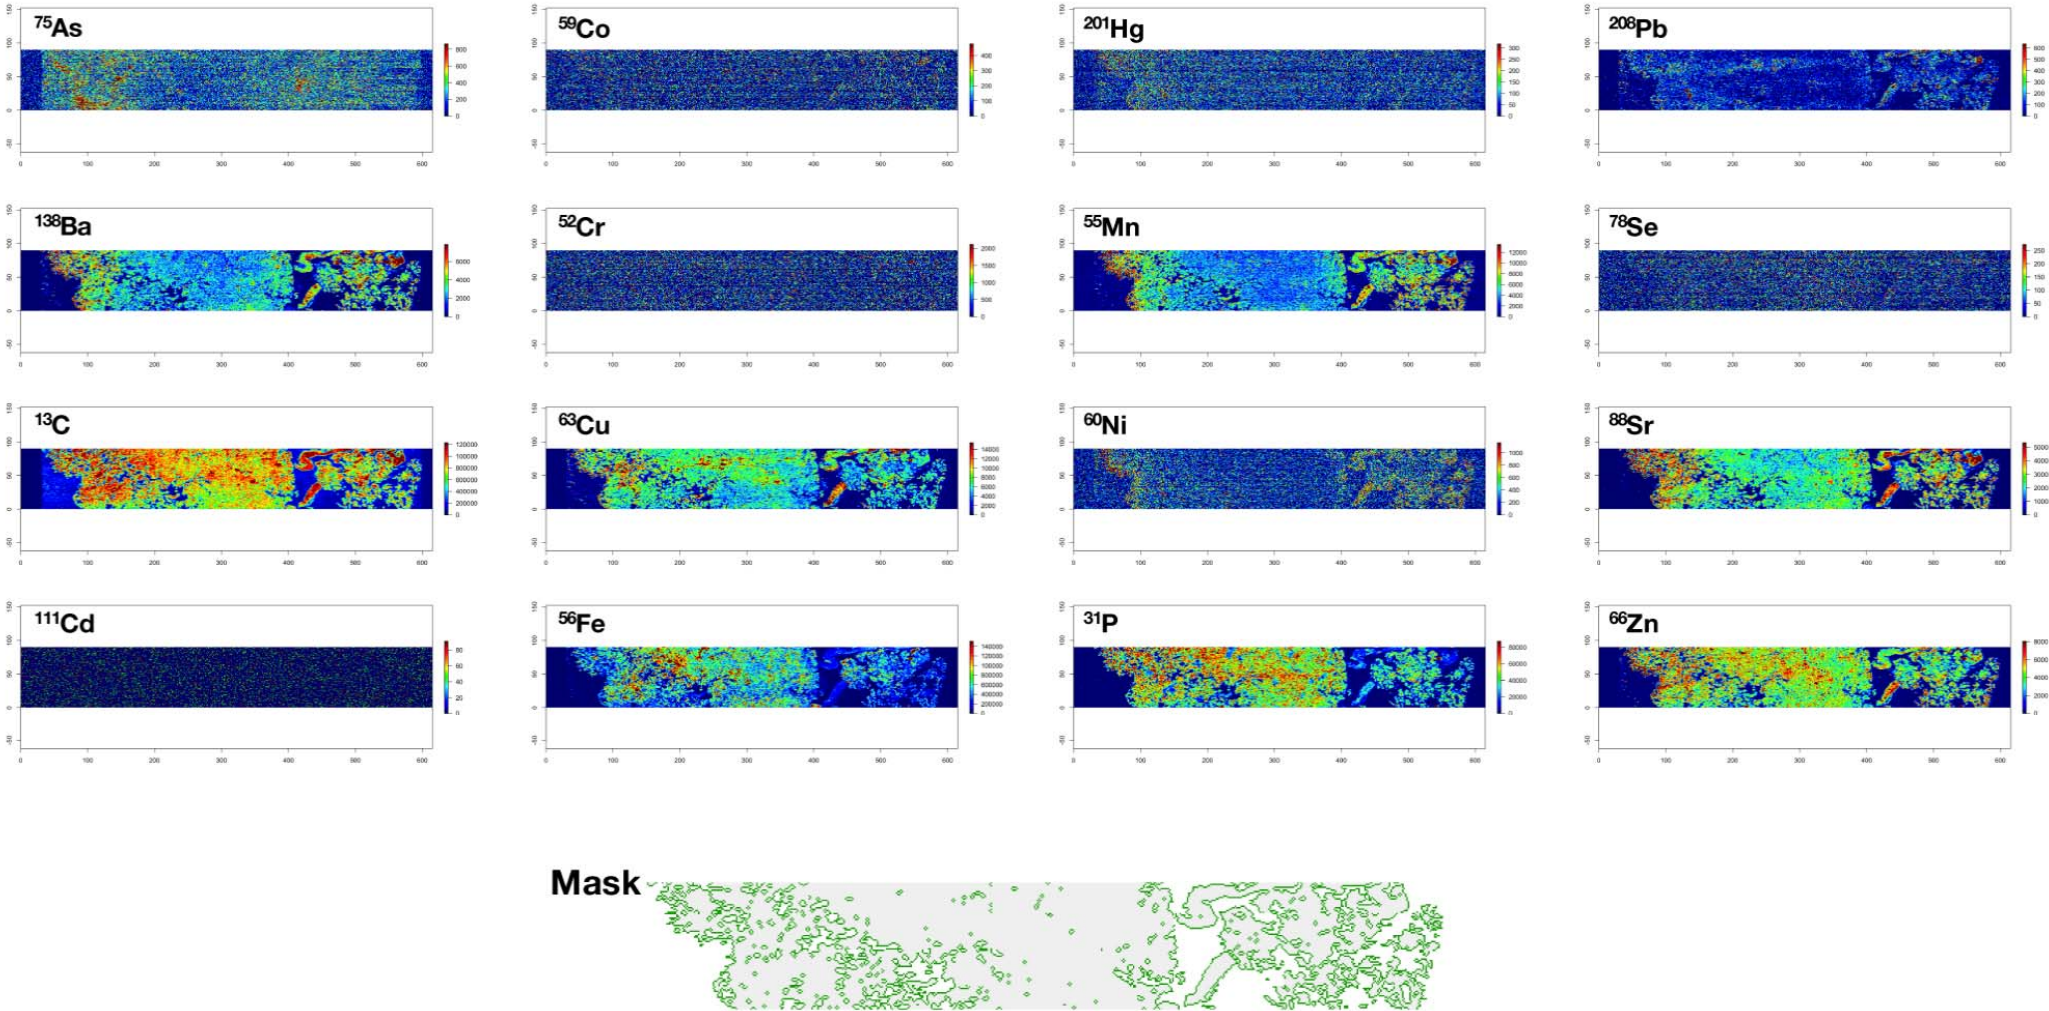

Supplementary Figure 7. Placenta sample 4, fetal side

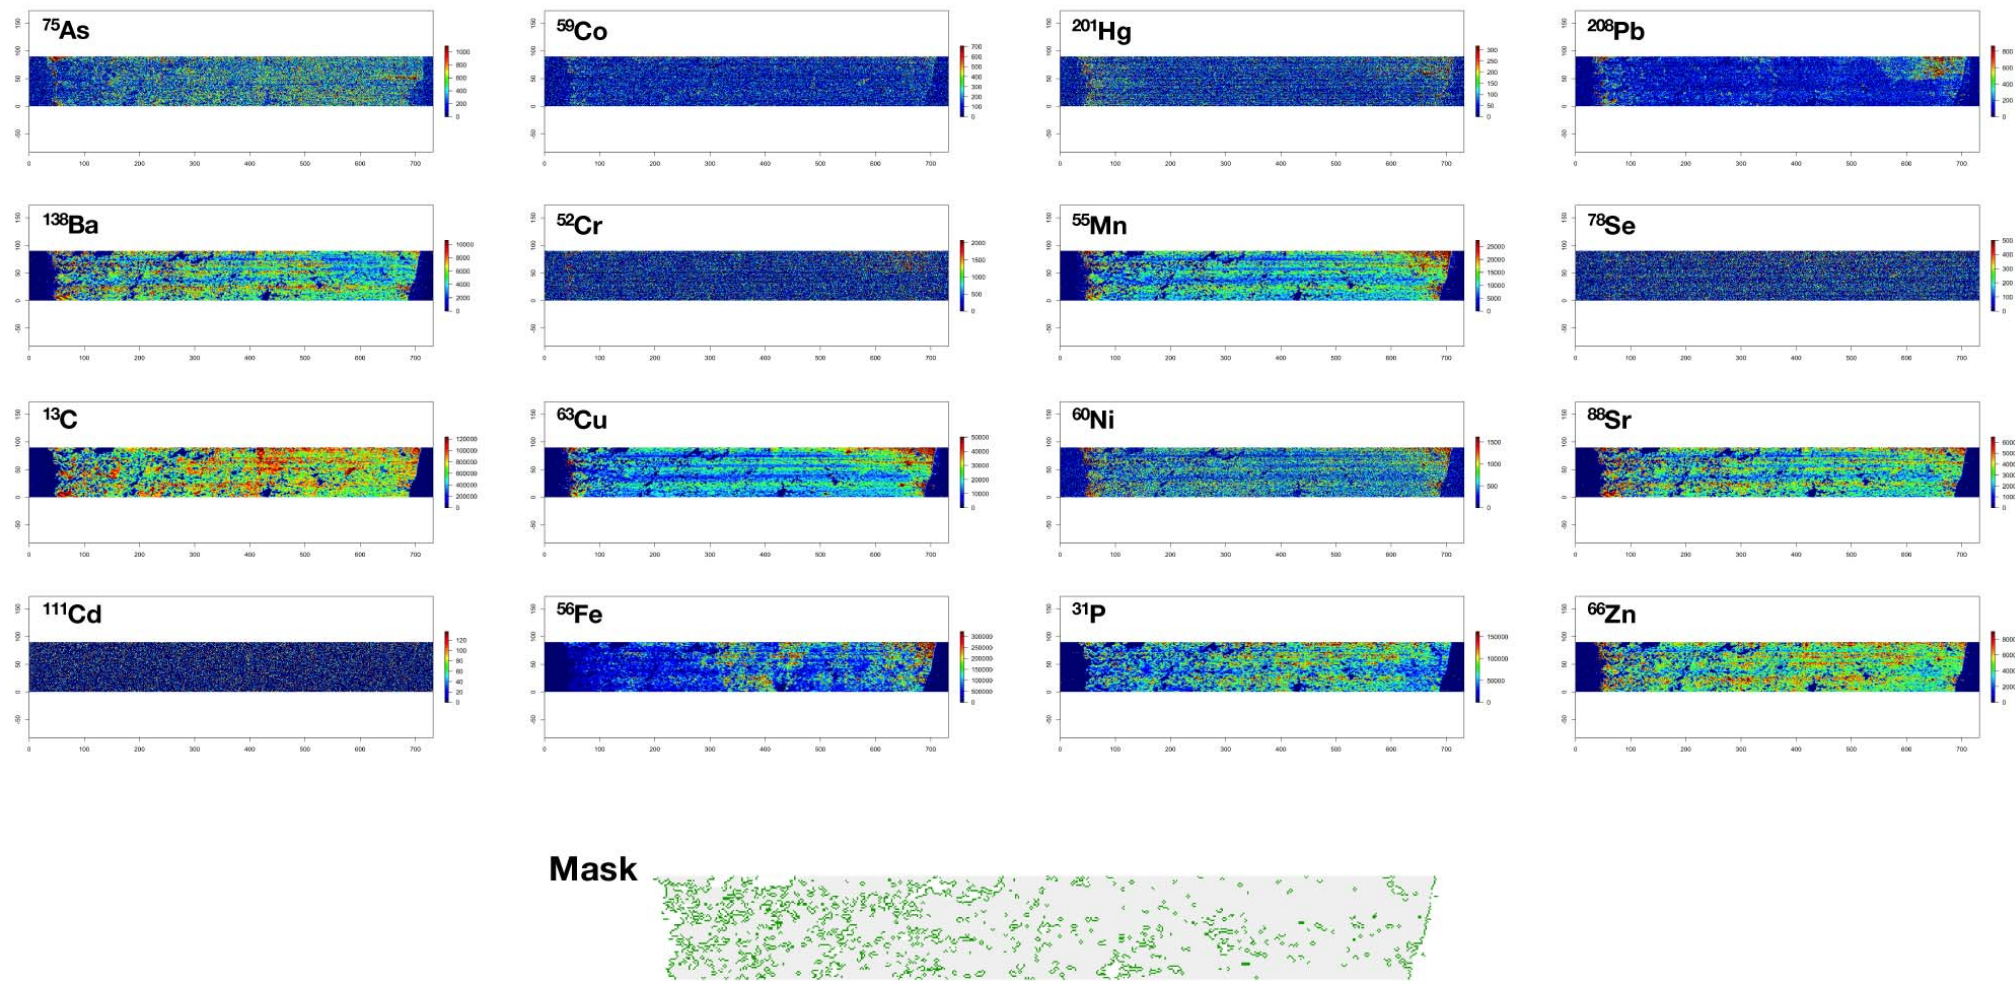



Supplementary Figure 8. Placenta sample 4, maternal side

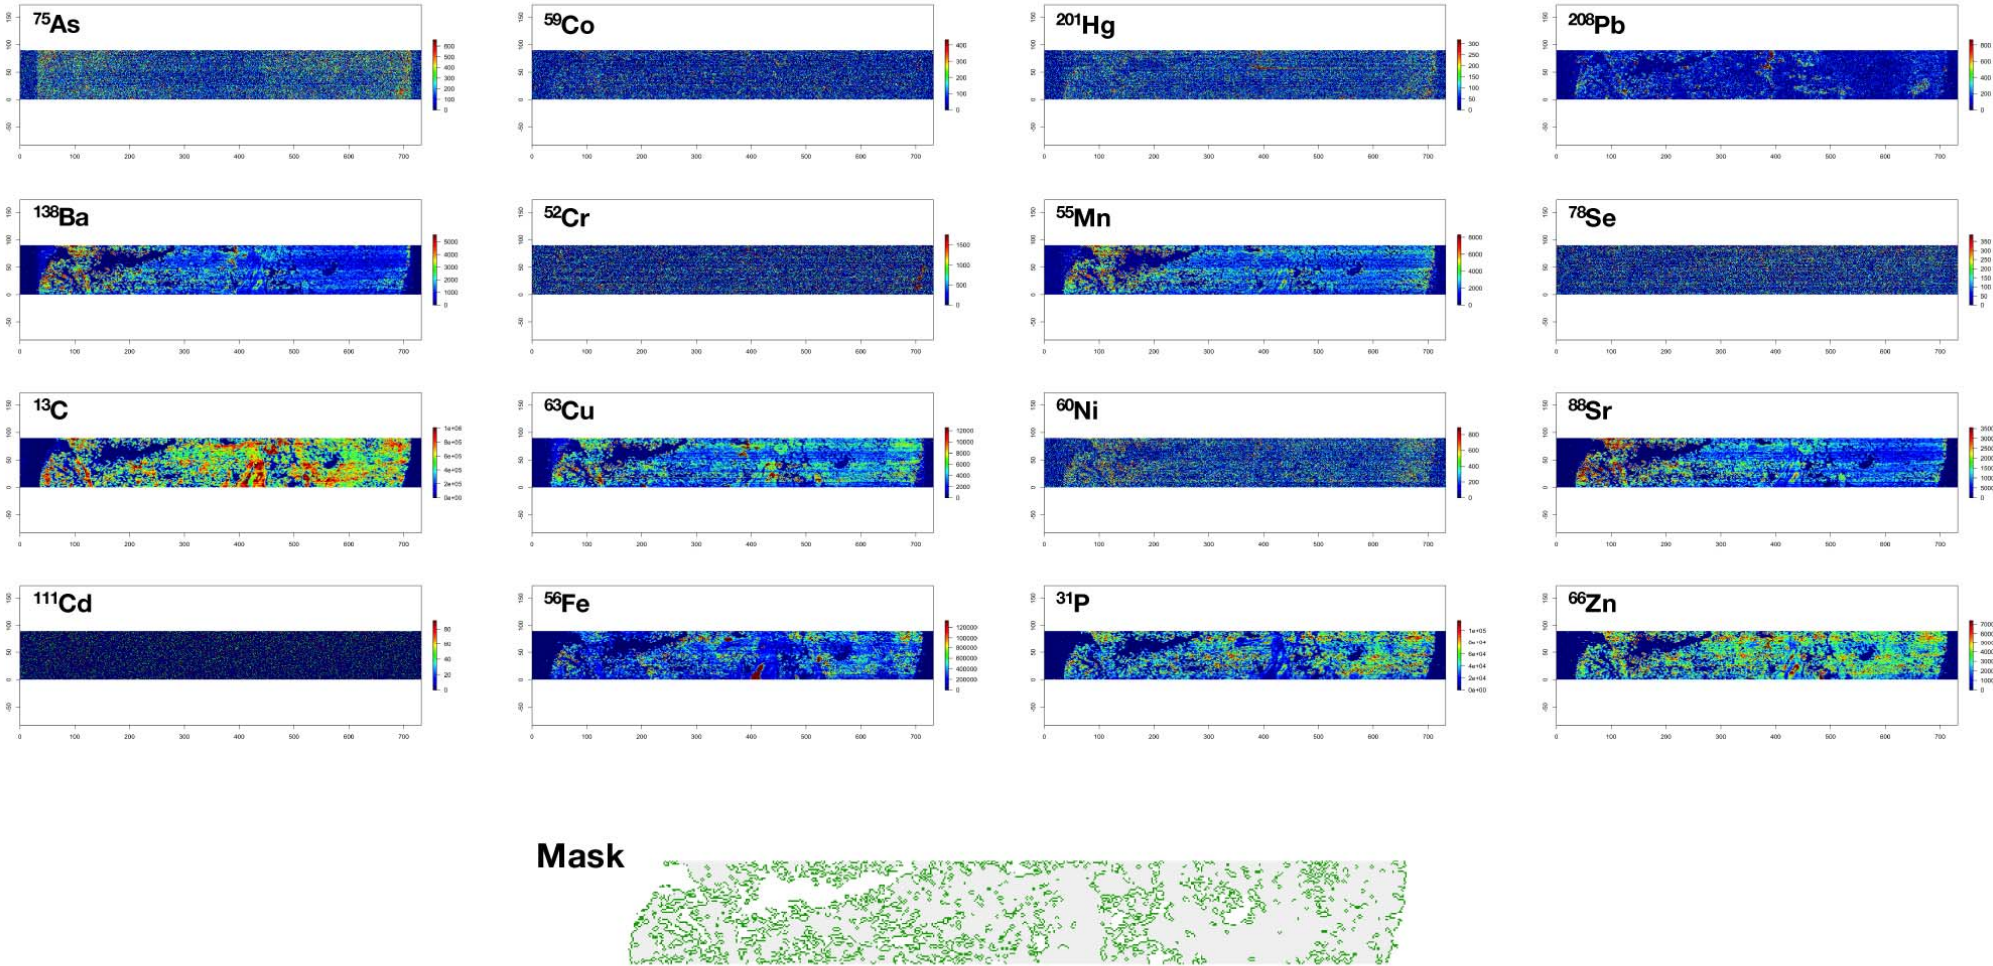

Supplementary Figure 9. Placenta sample 5, fetal side

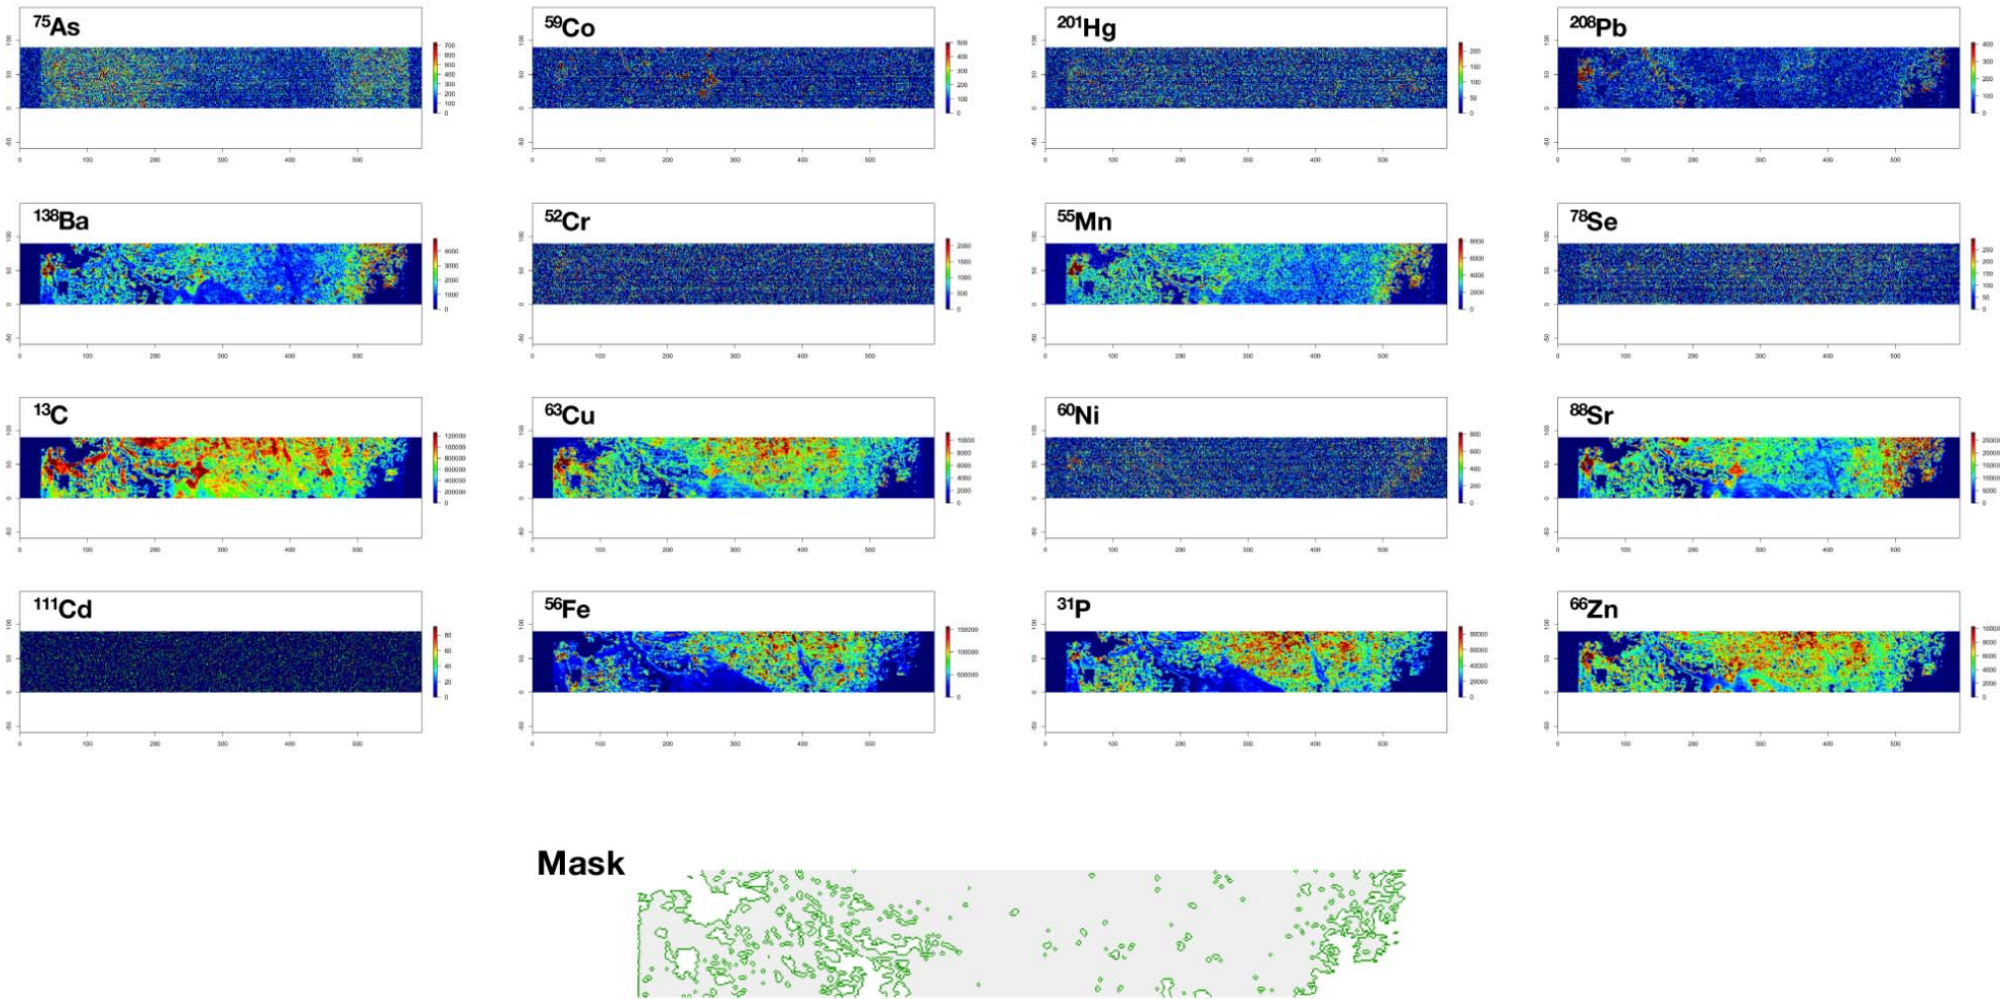

Supplementary Figure 10. Placenta sample 5, maternal side

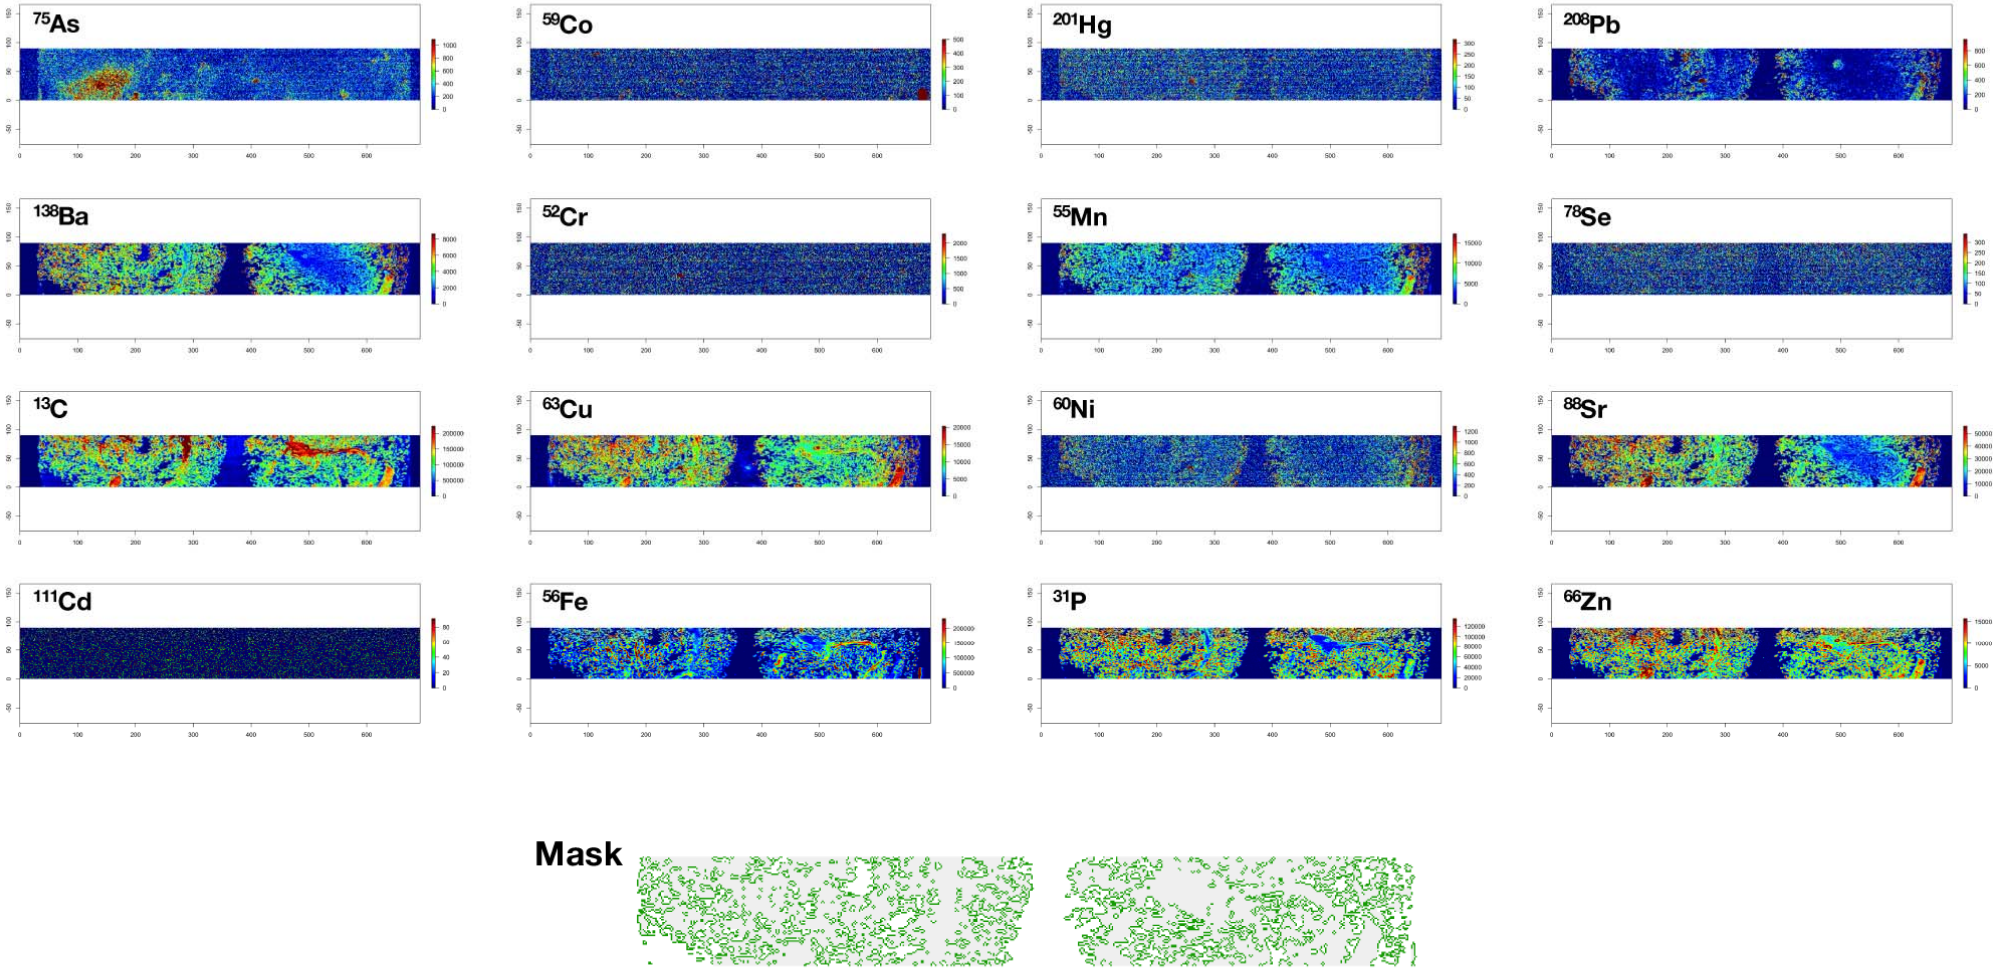

Supplement: c6mt00010j1.pdf [file c6mt00010j1.pdf]
